# Supplementary material
Source: publisher figshare collection journal article supplement (https://frontiersin.figshare.com/ndownloader/files/14627633)
Supplement: Supplementary file [file 14627633]

Supplement Figure S1. Timetable of recording procedure during study and follow-up period

| Time after being diagnosed as first-onset depression | 1st month                      | 2nd month                | 3rd month                                | 4-24 months | after 24 months                    |
|------------------------------------------------------|--------------------------------|--------------------------|------------------------------------------|-------------|------------------------------------|
|                                                      |                                |                          |                                          |             | <u>Being invited to this study</u> |
|                                                      |                                |                          |                                          |             | <u>End of follow-up</u>            |
| <u>The medication being prescribed</u>               | Antidepressant A               | Antidepressant A         | Antidepressant A                         | ...         |                                    |
|                                                      | BZD A                          | Augmentation A           | Antidepressant B                         | ...         |                                    |
|                                                      |                                | BZD A                    | Augmentation A                           | ...         |                                    |
|                                                      |                                |                          | BZD A                                    | ...         |                                    |
| <u>Pharmacological dissection</u>                    |                                |                          |                                          |             |                                    |
| Antidepressant load                                  | DDD of antidepressant A        | DDD of antidepressant A  | DDD of antidepressant A+antidepressant B | ...         |                                    |
| Augmentation load                                    |                                | DDD of augmentation A    | DDD of augmentation A                    | ...         |                                    |
| Sedative load                                        | Equivalent dose of BZD A       | Equivalent dose of BZD A | Equivalent dose of BZD A                 | ...         |                                    |
| <u>Clinical indicator</u>                            |                                |                          |                                          |             |                                    |
| Number of antidepressant use                         | Being recorded by chart review |                          |                                          |             |                                    |
| Emergency visits                                     |                                |                          |                                          |             |                                    |
| Admission                                            |                                |                          |                                          |             |                                    |
| OPD visits                                           |                                |                          |                                          |             | Keeping follow-up                  |
| Severity of depression                               |                                |                          |                                          |             | Evaluated by BDI score             |
